# Supplementary material
Source: PubMed Central journal article supplement (PMC2884956)
Supplement: supp_88_6_1753__1.pdf [file supp_88_6_1753__1.pdf]

**Supplementary Table S1.** Oligonucleotide primers used for cloning and sequencing FCoV S protein genes

| <b>Primer</b> | <b>Use</b>                                                                       | <b>Nucleotide sequence (5' to 3')</b>          | <b>Position*</b>             |
|---------------|----------------------------------------------------------------------------------|------------------------------------------------|------------------------------|
| T003          | Forward primer for amplification of the truncated Type II S gene                 | GGCGGTACCGCCACCATGATTGTGCTCGTAACTTGCC          | 20204-20227 on FIPV 79-1146  |
| T004          | Reverse primer for amplification of the truncated Type II S gene                 | GGCCTCGAGCTATTCAAATTGTCTTCTACTACATATAGAGTGAC   | 24497-24528 on FIPV 79-1146  |
| T009          | Forward primer for amplification of the full-length Type II S gene               | GGCGGTACCGCCACCATGATTGTGCTCGTAACTTGCCCTTGT     | 20204-20233 on FIPV 79-1146  |
| T010          | Reverse primer for amplification of the full-length Type II S gene               | GGCCTCGAGTTAGTGGACATGCACCTTTTTCAATTGGTTCA      | 24534-24564 on FIPV 79-1146  |
| T013          | Forward primer for amplification of the truncated and full-length Type I S genes | GGCGGTACCGCCACCATGATCTTGTTACTAGCGCTTTTTAGTGTGT | 20384-20419 on FCoV C1Je     |
| T014          | Reverse primer for amplification of the truncated Type I S gene                  | GGCCTCGAGCTATTCAAATTGTCTTATACTGCAAAGAGAATGAC   | 24724-24755 on FCoV C1Je     |
| T015          | Reverse primer for amplification of the full-length Type I S gene                | GGCCTCGAGTTAATGAATGTGAACCTTCTCAATGGG           | 24765-24793 on FCoV C1Je     |
| pCAGG-F       | Sequencing the proximal plasmid-insert junction of the pCAGGS plasmid            | ACGTGGTTGGTTAATTGTGCTGTC                       | 1662-1686 on pCAGGS          |
| pCAGG-R       | Sequencing the distal plasmid-insert junction of the pCAGGS plasmid              | TCCCATATGTCCTTCCGAGTGA                         | 1886-1908 on pCAGGS          |
| M13-F         | Sequencing the proximal plasmid-insert junction across the TOPO cloning site     | CAGGAAACAGCTATGAC                              | 433-448 on pCR-Blunt II-TOPO |
| M13-R         | Sequencing the distal plasmid-insert junction across the TOPO cloning site       | GTAAAACGACGGCCAG                               | 205-221 on pCR-Blunt II-TOPO |

\* FIPV 79-1146, Acc. No. DQ010921; FCoV C1Je, Acc. No. DQ848678; pCAGGS, Riken Bioresources Center, pCR-Blunt-II-TOPO, Invitrogen

**Supplementary Table S2.** Plasmids used to transfect HEK 293T cells for the production of retroviral pseudotypes

| Pseudotype      | Surface protein            | Components | Constituent Plasmid DNA | DNA added to transfection |
|-----------------|----------------------------|------------|-------------------------|---------------------------|
| MLV(VSV-G)      | VSV-G                      | Gag-Pol    | cMVi                    | 400ng                     |
|                 |                            | GFP        | cNCG                    | 1000ng                    |
|                 |                            | VSV-G      | pMDG                    | 1000ng                    |
| MLV(bald)       | none                       | Gag-Pol    | CMVi                    | 400ng                     |
|                 |                            | GFP        | cNCG                    | 1000ng                    |
|                 |                            | Empty      | pCAGGS                  | 500ng                     |
| MLV(FCoVII-Str) | FCoV type II S (truncated) | Gag-Pol    | cMVi                    | 400ng                     |
|                 |                            | GFP        | cNCG                    | 1000ng                    |
|                 |                            | 79-1146 S  | pCAGGS/FCoVSItr         | 500ng                     |
| MLV(FcoVI-Str)  | FCoV type I S (truncated)  | Gag-Pol    | cMVi                    | 400ng                     |
|                 |                            | GFP        | cNCG                    | 1000ng                    |
|                 |                            | C1Je S     | pCAGGS/FCoVSItr         | 500ng                     |

---

**Dye, C., Temperton, N. and Siddell, S. G. (2007).** Type I feline coronavirus spike glycoprotein fails to recognize aminopeptidase N as a functional receptor on feline cell lines. *J Gen Virol* **88**, 1753–1760.
